# Supplementary material
Source: PubMed Central journal article supplement (PMC5799036)
Supplement: NIHMS927934-supplement-1.pdf [file NIHMS927934-supplement-1.pdf]

## **SUPPLEMENTAL INFORMATION INVENTORY**

### **Supplemental Figures S1-S4**

**Figure S1**, related to STAR Methods, Figure 2, and Table S2.

**Figure S2**, related to STAR Methods.

**Figure S3**, related to STAR Methods, Figures 4, 5, and 6.

**Figure S4**, related to Figure 4.

### **Supplemental Tables S1-S10**

**Table S1**, related to STAR Methods and Figure 2.

**Table S2**, related to STAR Methods, Figure 2, and Figure S1.

**Table S3**, related to STAR Methods and Figure 2.

**Table S4**, related to Figure 2.

**Table S5**, related to Figure 2.

**Table S6**, related to Figure 2.

**Table S7**, related to Figure 2.

**Table S8**, related to Figure 3.

**Table S9**, related to STAR Methods.

**Table S10**, related to STAR Methods.

**Table S11**, related to STAR Methods.
